# Supplementary material for: Surface enhanced fluorescence and nanoscopic cell wall deformation in adheringStaphylococcus aureusupon exposure to cell wall active and non-active antibiotics
Source: Royal Society of Chemistry journal article supplement (doi:10.1039/c8nr01669k), 2018-01-01
Supplement: c8nr01669k1.pdf [file c8nr01669k1.pdf]

**Supporting Information:**

**Surface enhanced fluorescence and nanoscopic cell wall deformation**

**in adhering *Staphylococcus aureus***

**upon exposure to cell wall active and non-active antibiotics**

Vera Carniello, Brandon W. Peterson, Jelmer Sjollema, Henk J. Busscher, Henny C. van der Mei\*

University of Groningen and University Medical Center Groningen, Department of BioMedical Engineering,  
Groningen, Netherlands

\*E-mail: h.c.van.der.mei@umcg.nl

**Table S1.**

Surface free energy parameters and components of the three liquids used for contact angle measurements.  $\gamma^-$  and  $\gamma^+$  are the electron-donating and electron-accepting parameters, while  $\gamma^{AB}$  and  $\gamma^{LW}$  are the acid-base and Lifshitz-Van der Waals components, respectively. All data in ( $\text{mJ m}^{-2}$ ) and taken from Van Oss *et al.*<sup>1</sup>

| Liquid        | Water | Formamide | $\alpha$ -bromonaphthalene |
|---------------|-------|-----------|----------------------------|
| $\gamma^-$    | 25.5  | 39.6      | 0                          |
| $\gamma^+$    | 25.5  | 2.3       | 0                          |
| $\gamma^{AB}$ | 51.0  | 19.0      | 0                          |
| $\gamma^{LW}$ | 21.8  | 39.0      | 44.4                       |

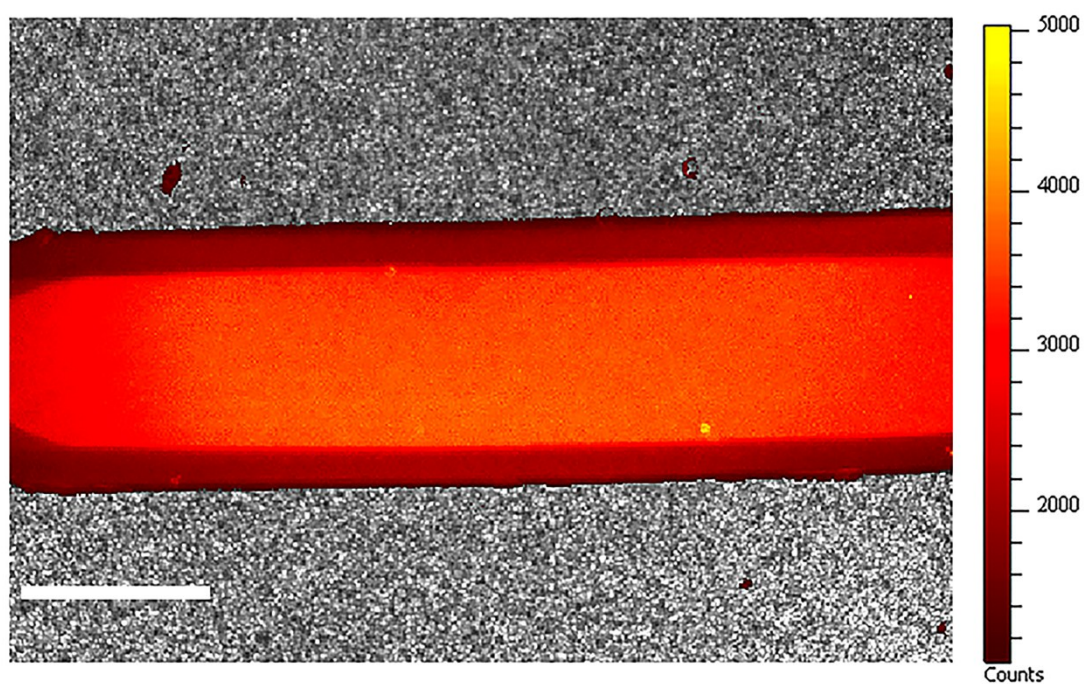

**Figure S1.**

Representative fluorescence image of sedimented, fluorescent *S. aureus* ATCC 12600<sup>GFP</sup> in a parallel plate flow chamber, as used for SEF experiments, showing homogeneous fluorescence distribution in the center of the chamber, which was taken as the ROI in SEF. Scale bar is 1 cm. Pseudo-color bar represents the photon count.

## References

- 1 C. J. van Oss, R. F. Giese, Z. Li, K. Murphy, J. Norris, M. K. Chaudhury and R. J. Good, *J. Adhes. Sci. Technol.*, 1992, **6**, 413–428.
